# Supplementary material
Source: Springer Nature journal article supplement (https://www.springermedizin.de/resource/supplementary/12991_2009_998_MOESM4_ESM.pdf/9615540)
Supplement: MOESM4 [file 9615540]

**Depressive Vulnerability**

*(trait-like anhedonia)*

(i.e. predepressive personality)

Psychosocial  
Stressors

**Coping strategies**

*(trait-like anhedonia,*  
not directly linked to a  
depressive temperament)

Prodromal or  
early symptoms  
*(State-like  
anhedonia)*

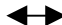

Overt Major  
Depression  
(melancholic, vital or  
endogenomorphic  
syndromes)
